# Supplementary material for: Effects of Outer Membrane Vesicle Formation, Surface-Layer Production and Nanopod Development on the Metabolism of Phenanthrene by Delftia acidovorans Cs1-4
Source: PubMed Central journal article supplement (PMC3958437; doi:10.1371/journal.pone.0092143), 2014-03-18
Supplement: pone.0092143.s001.pdf [file pone.0092143.s001.pdf]

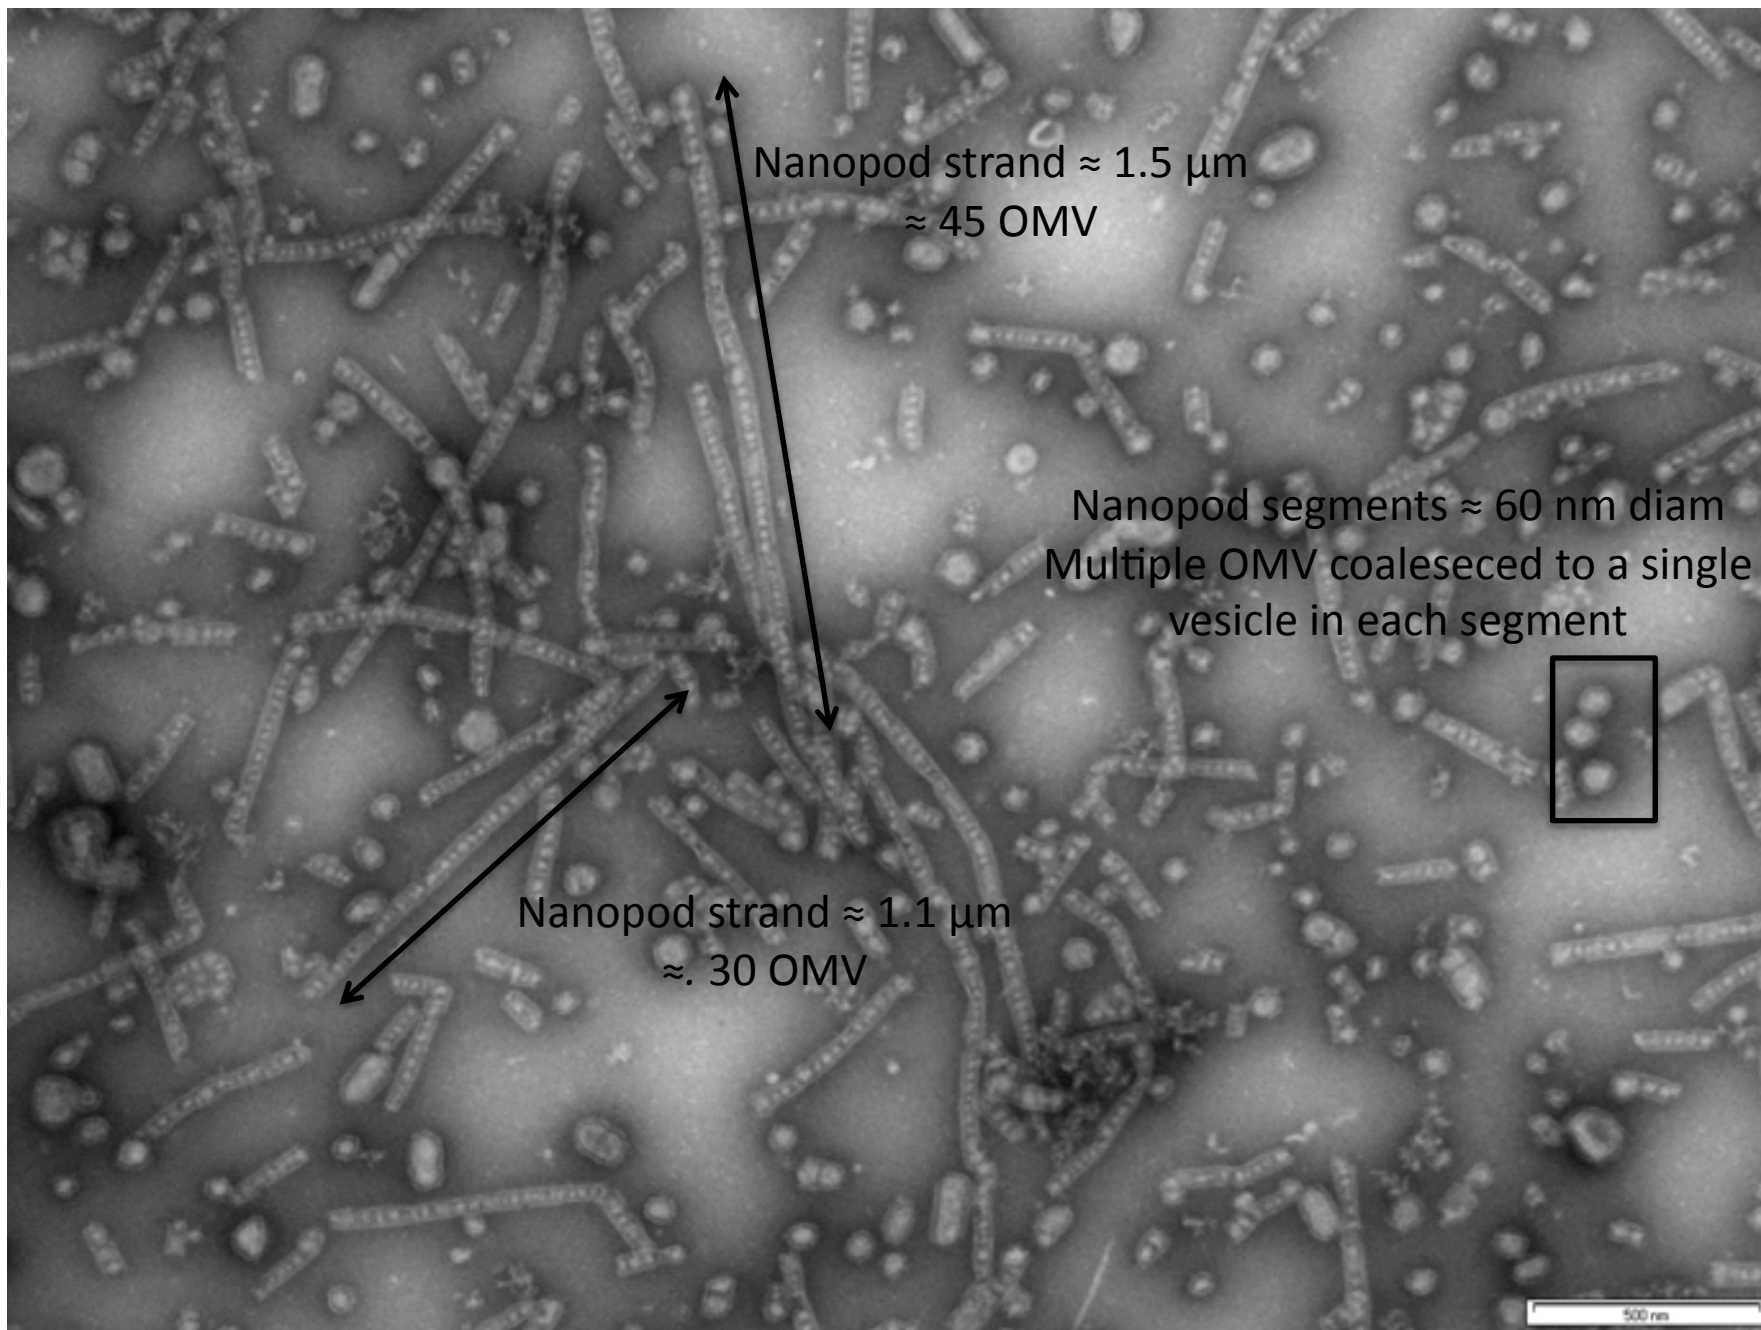

Figure S1\_A

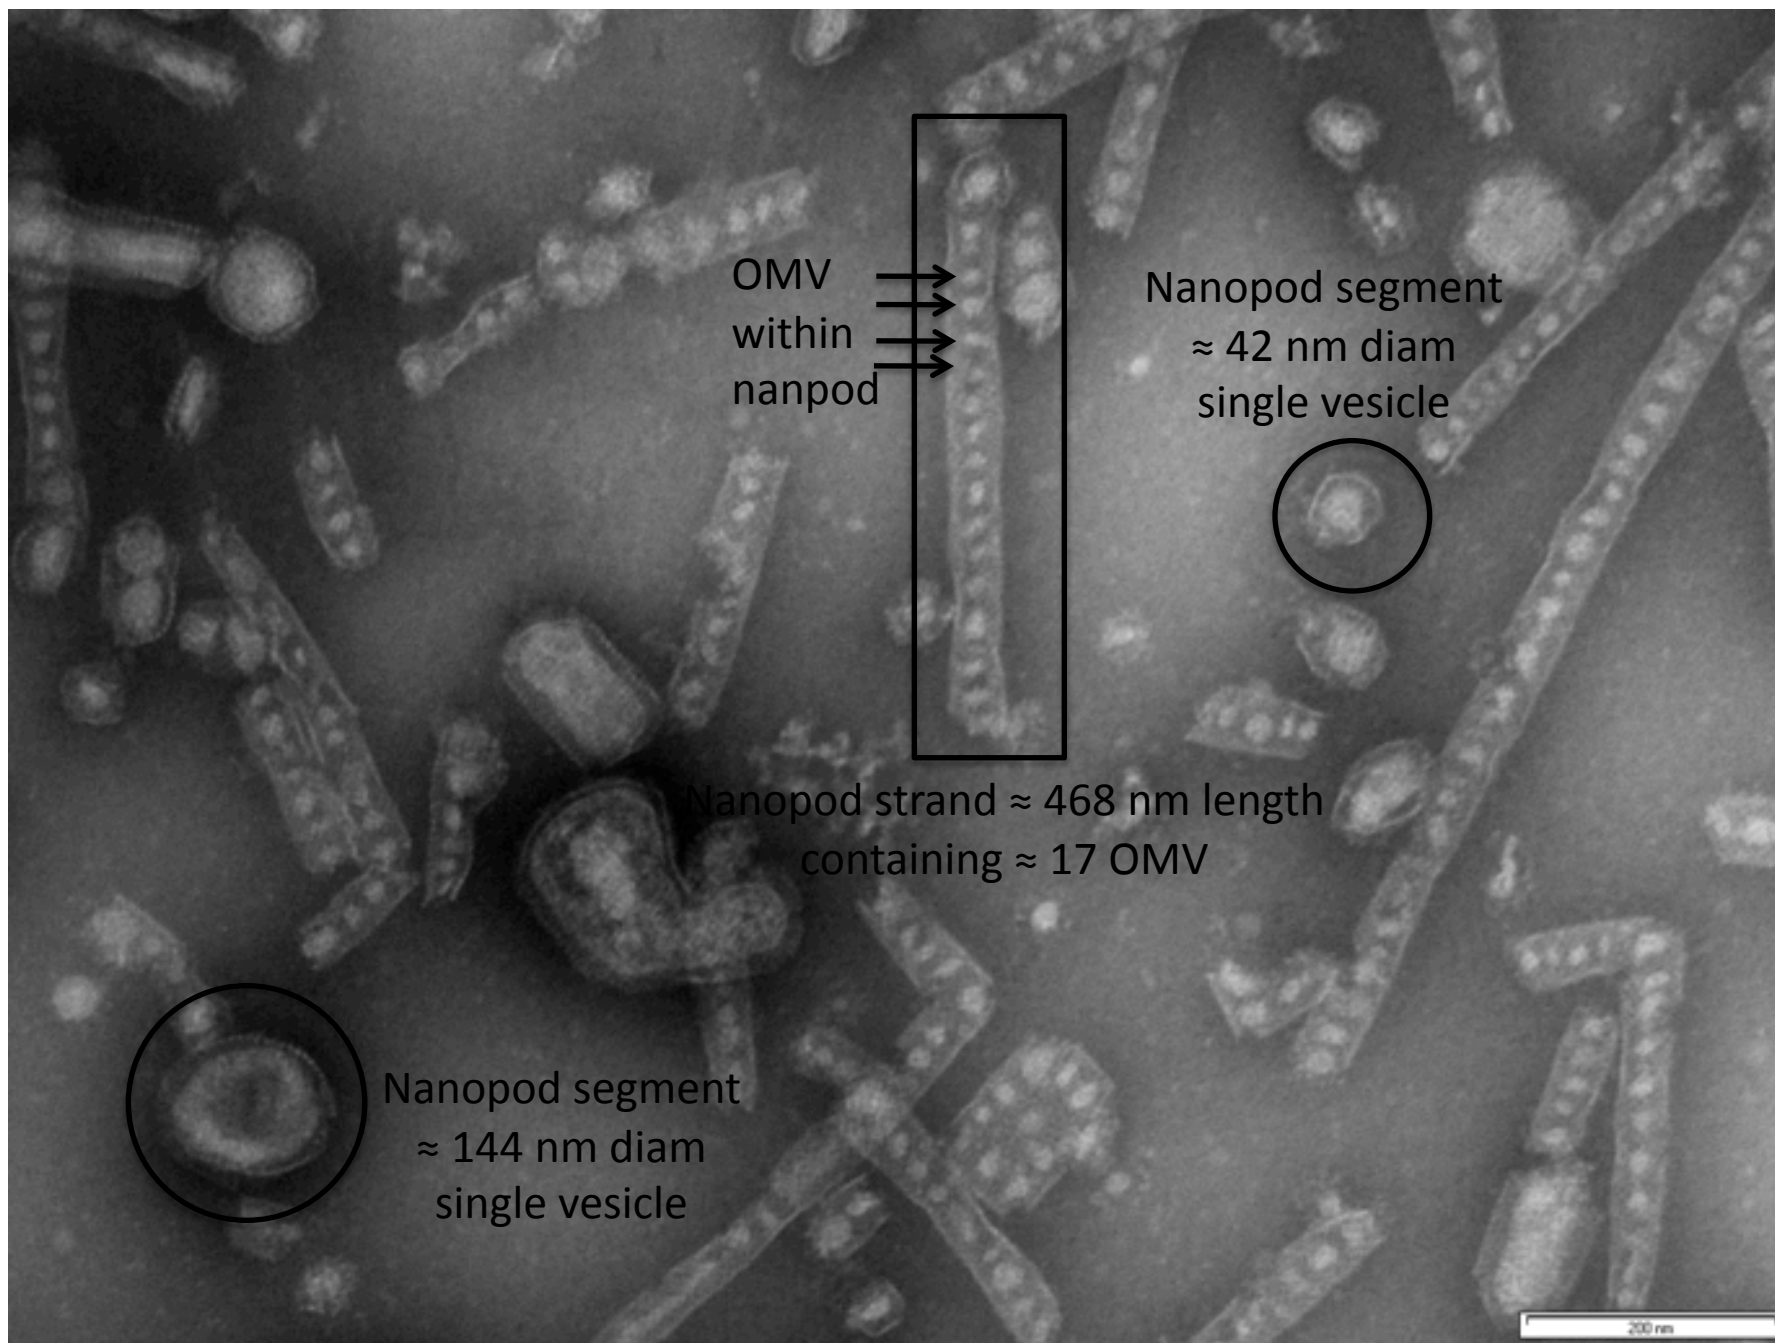

Figure S1\_B

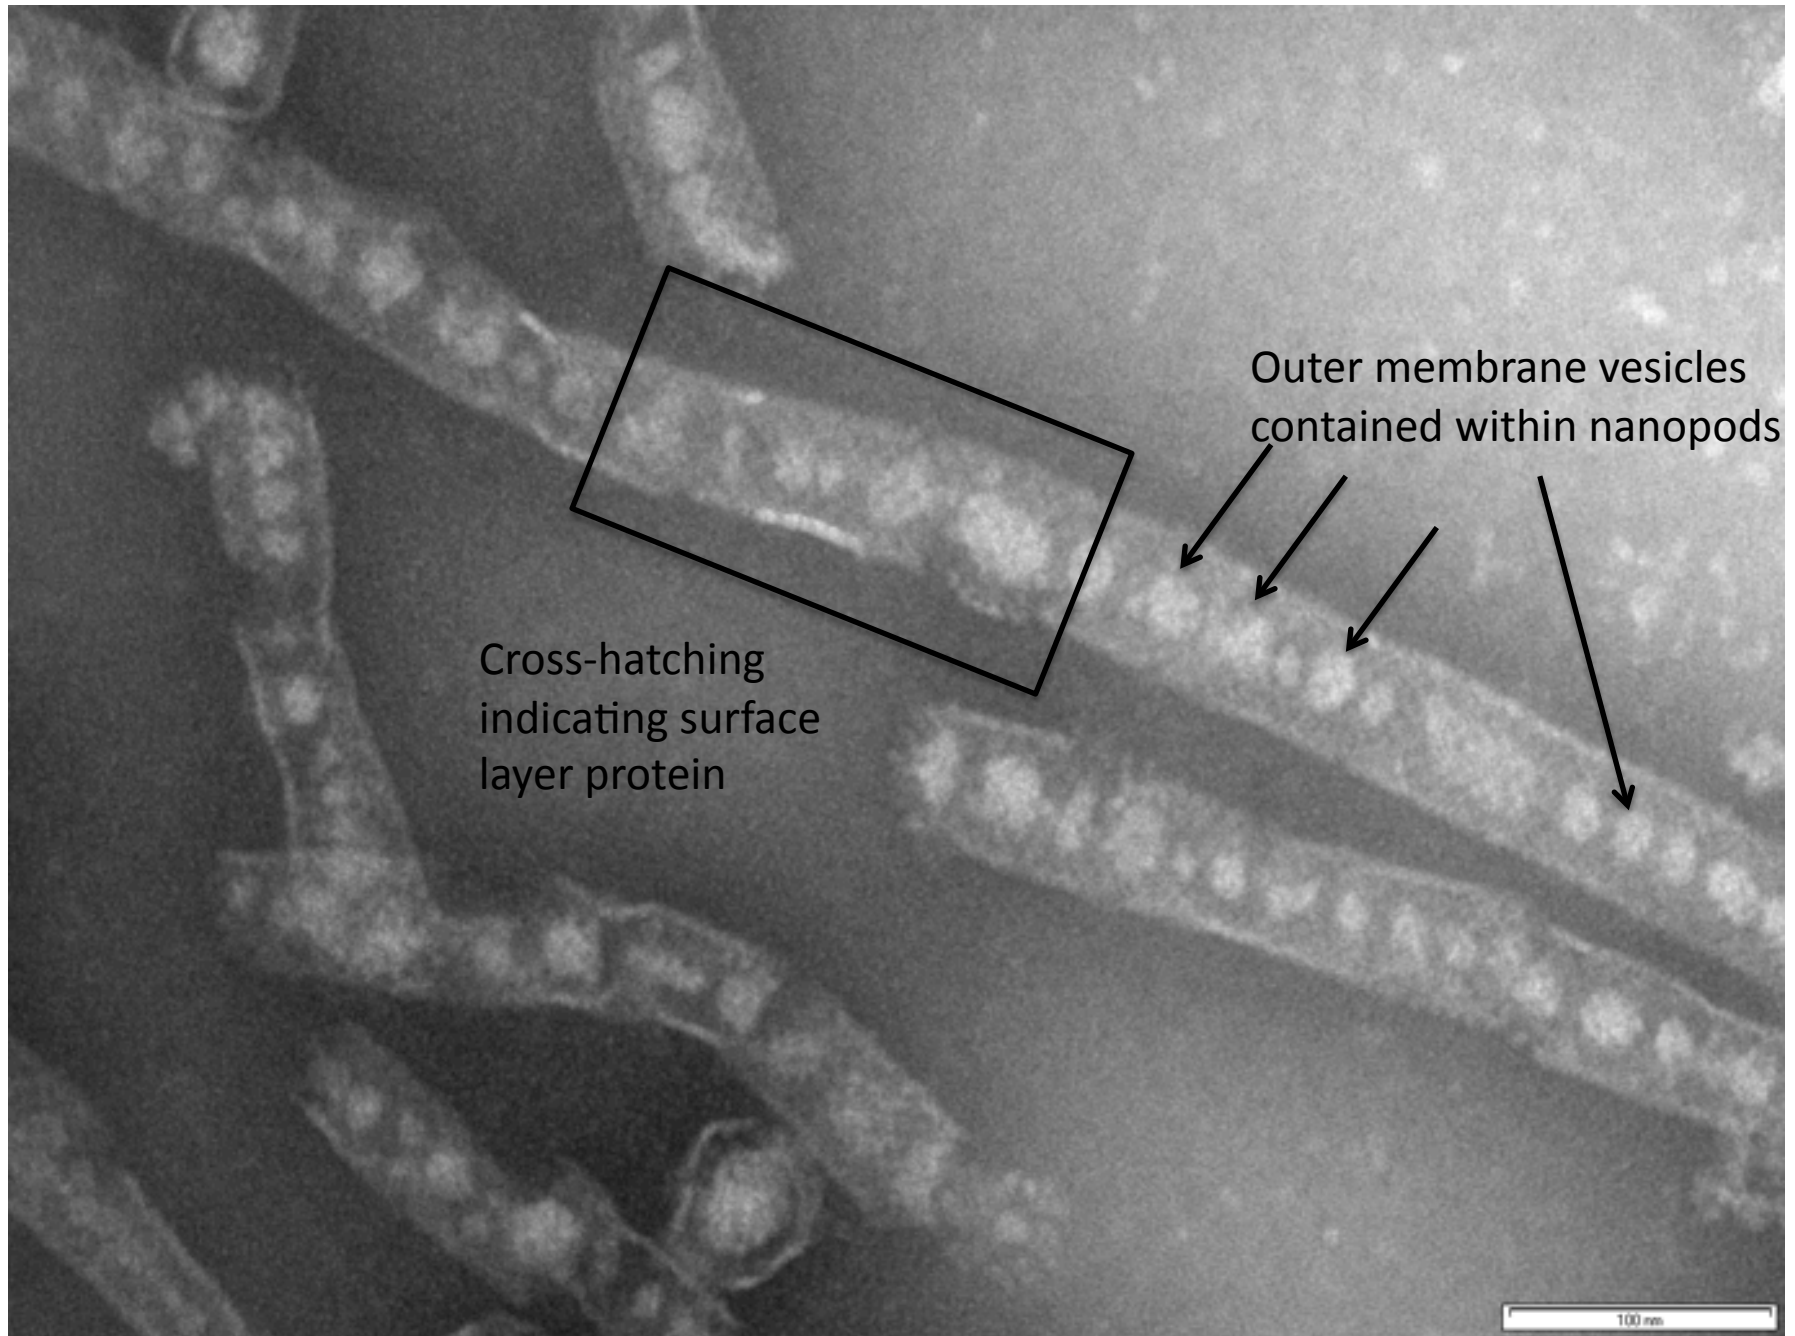

Figure S1\_C

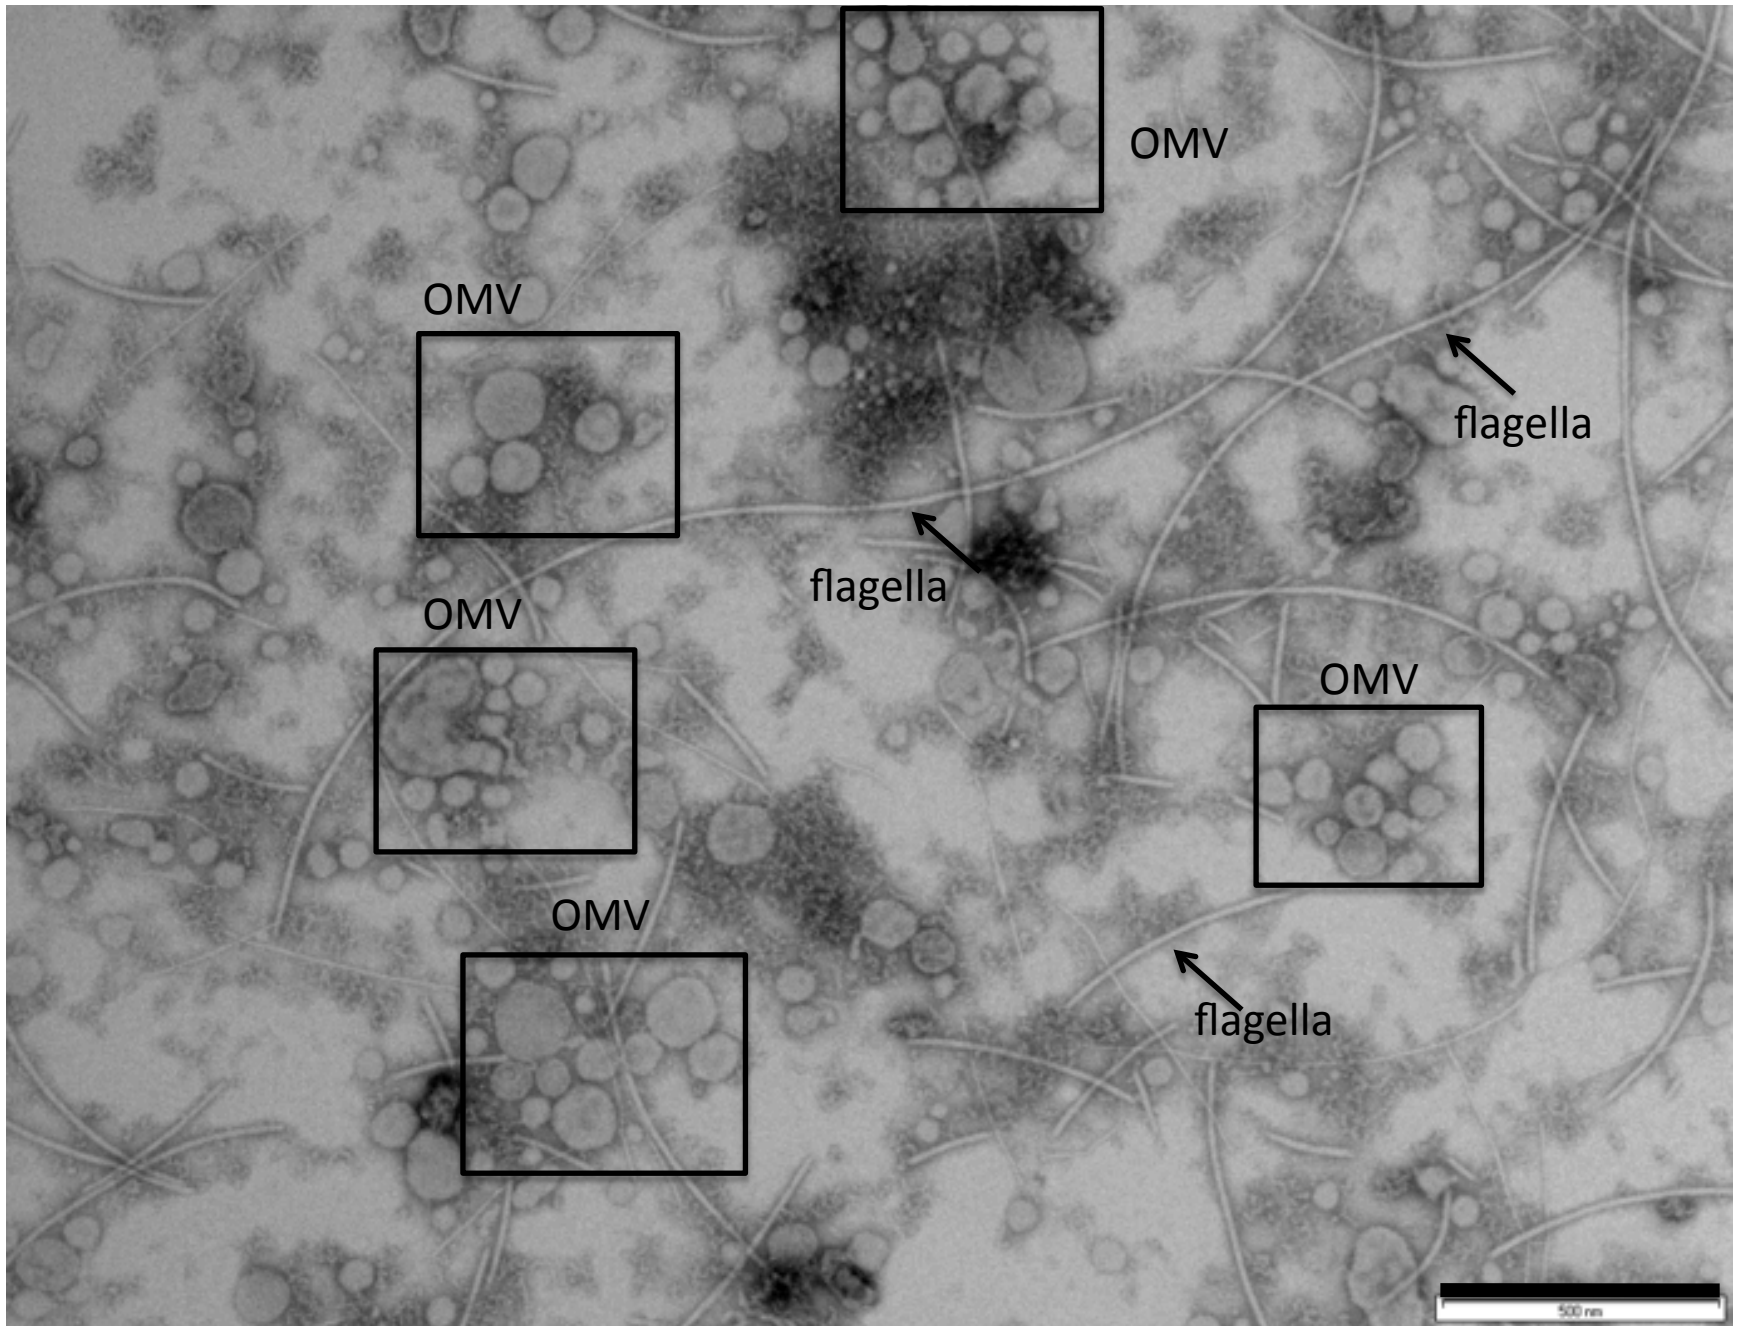

Figure S1\_D

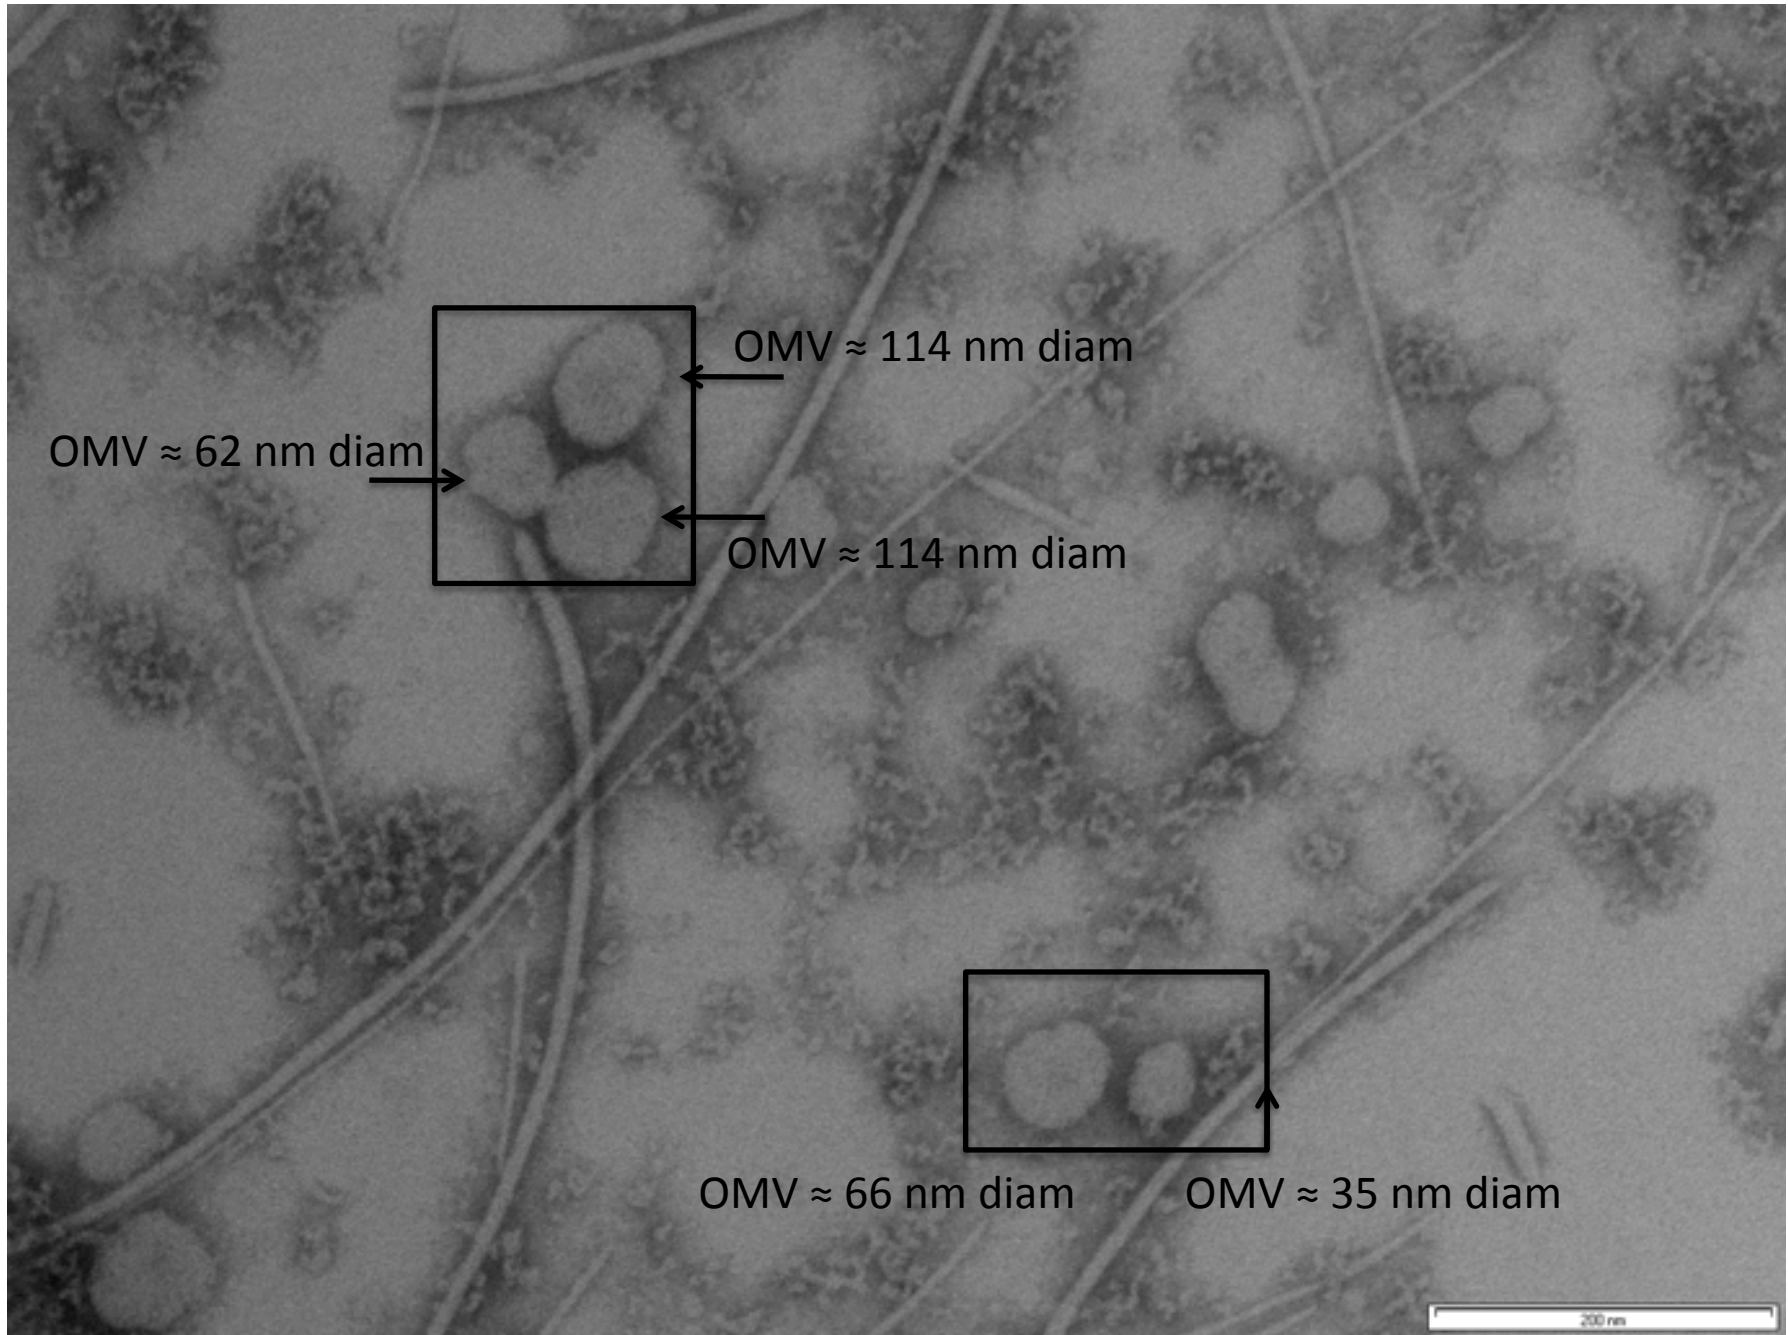

Figure S1\_E

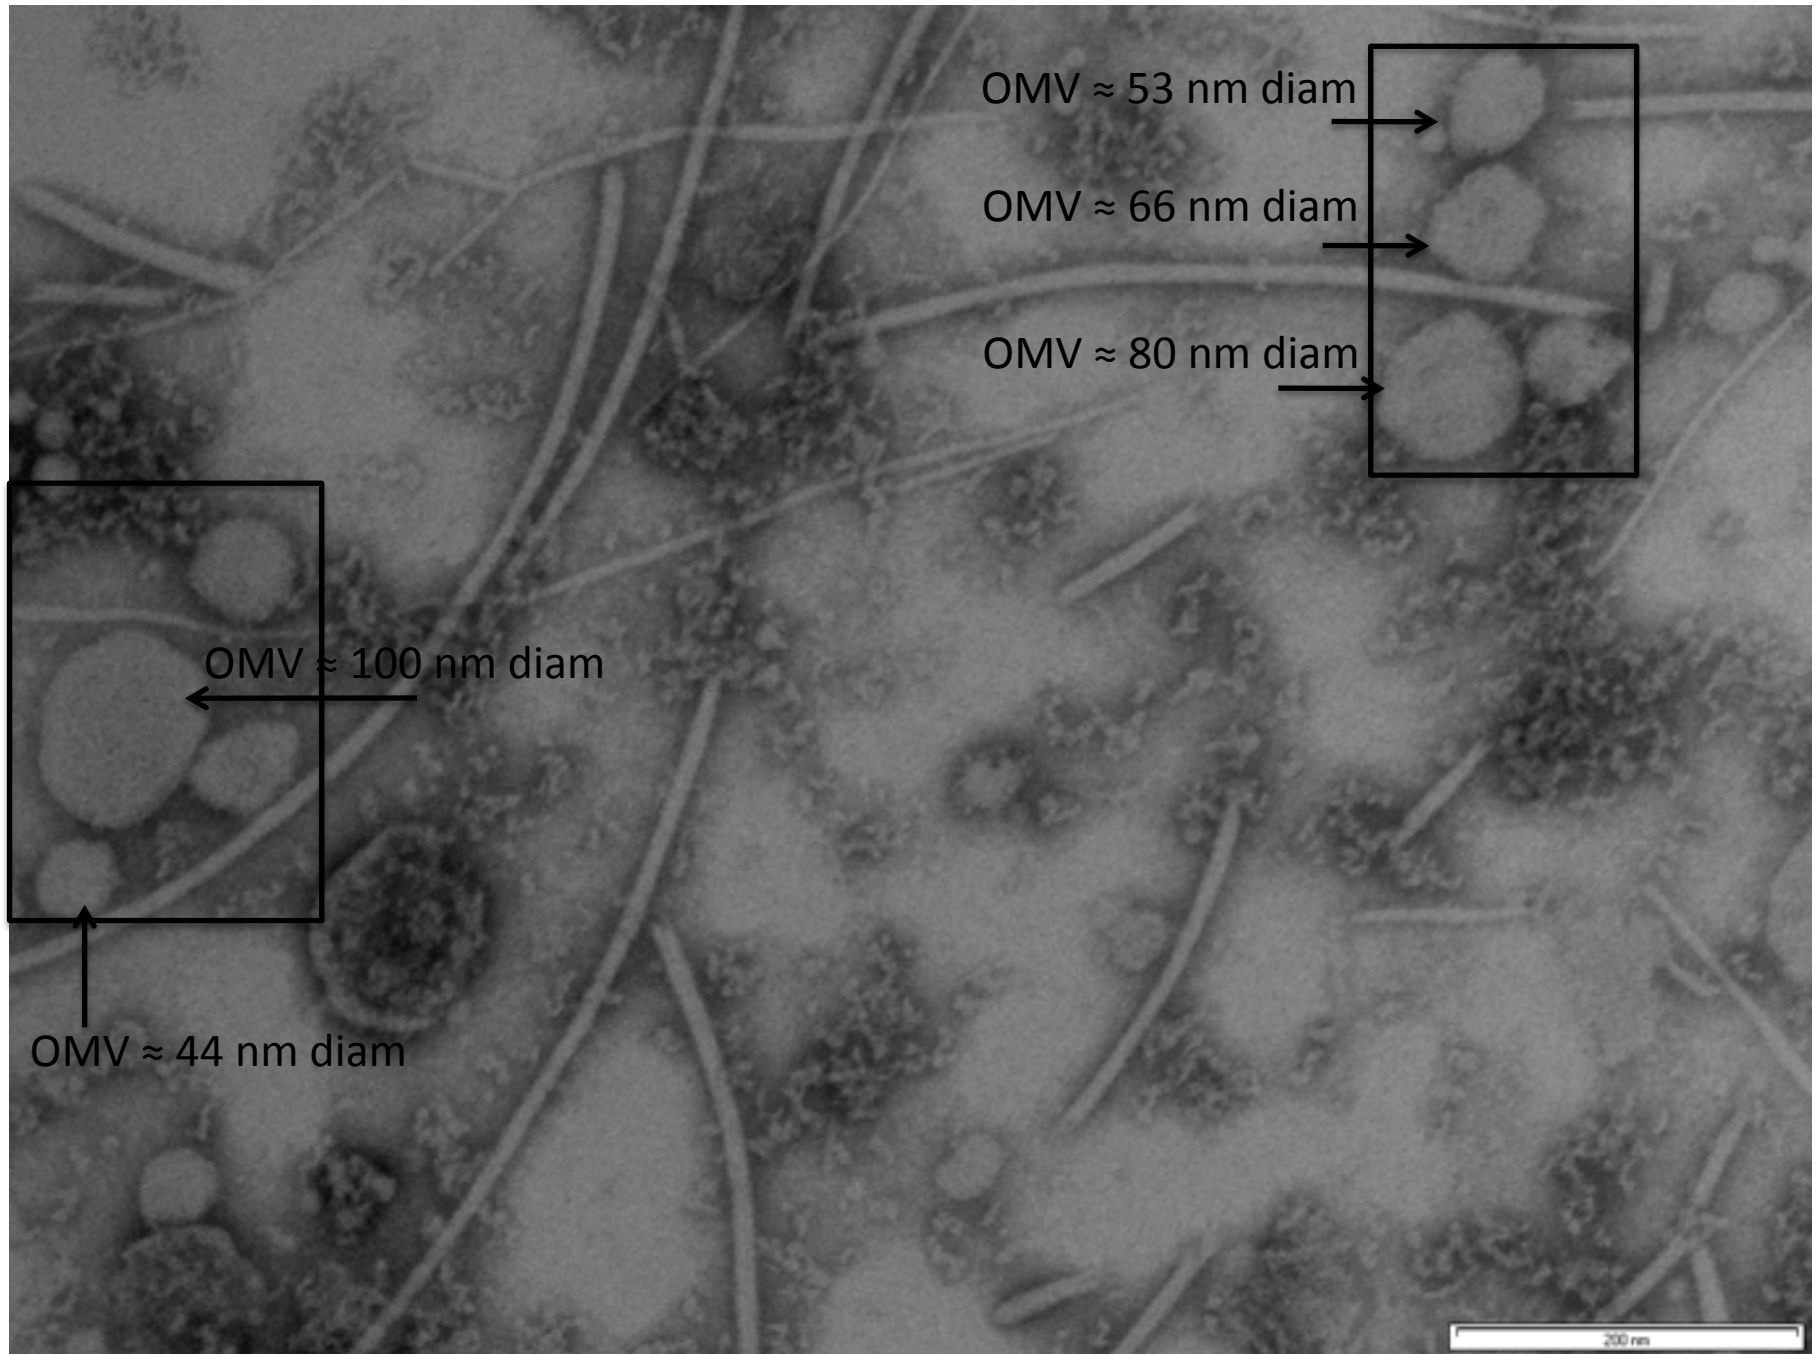

Figure S1\_F

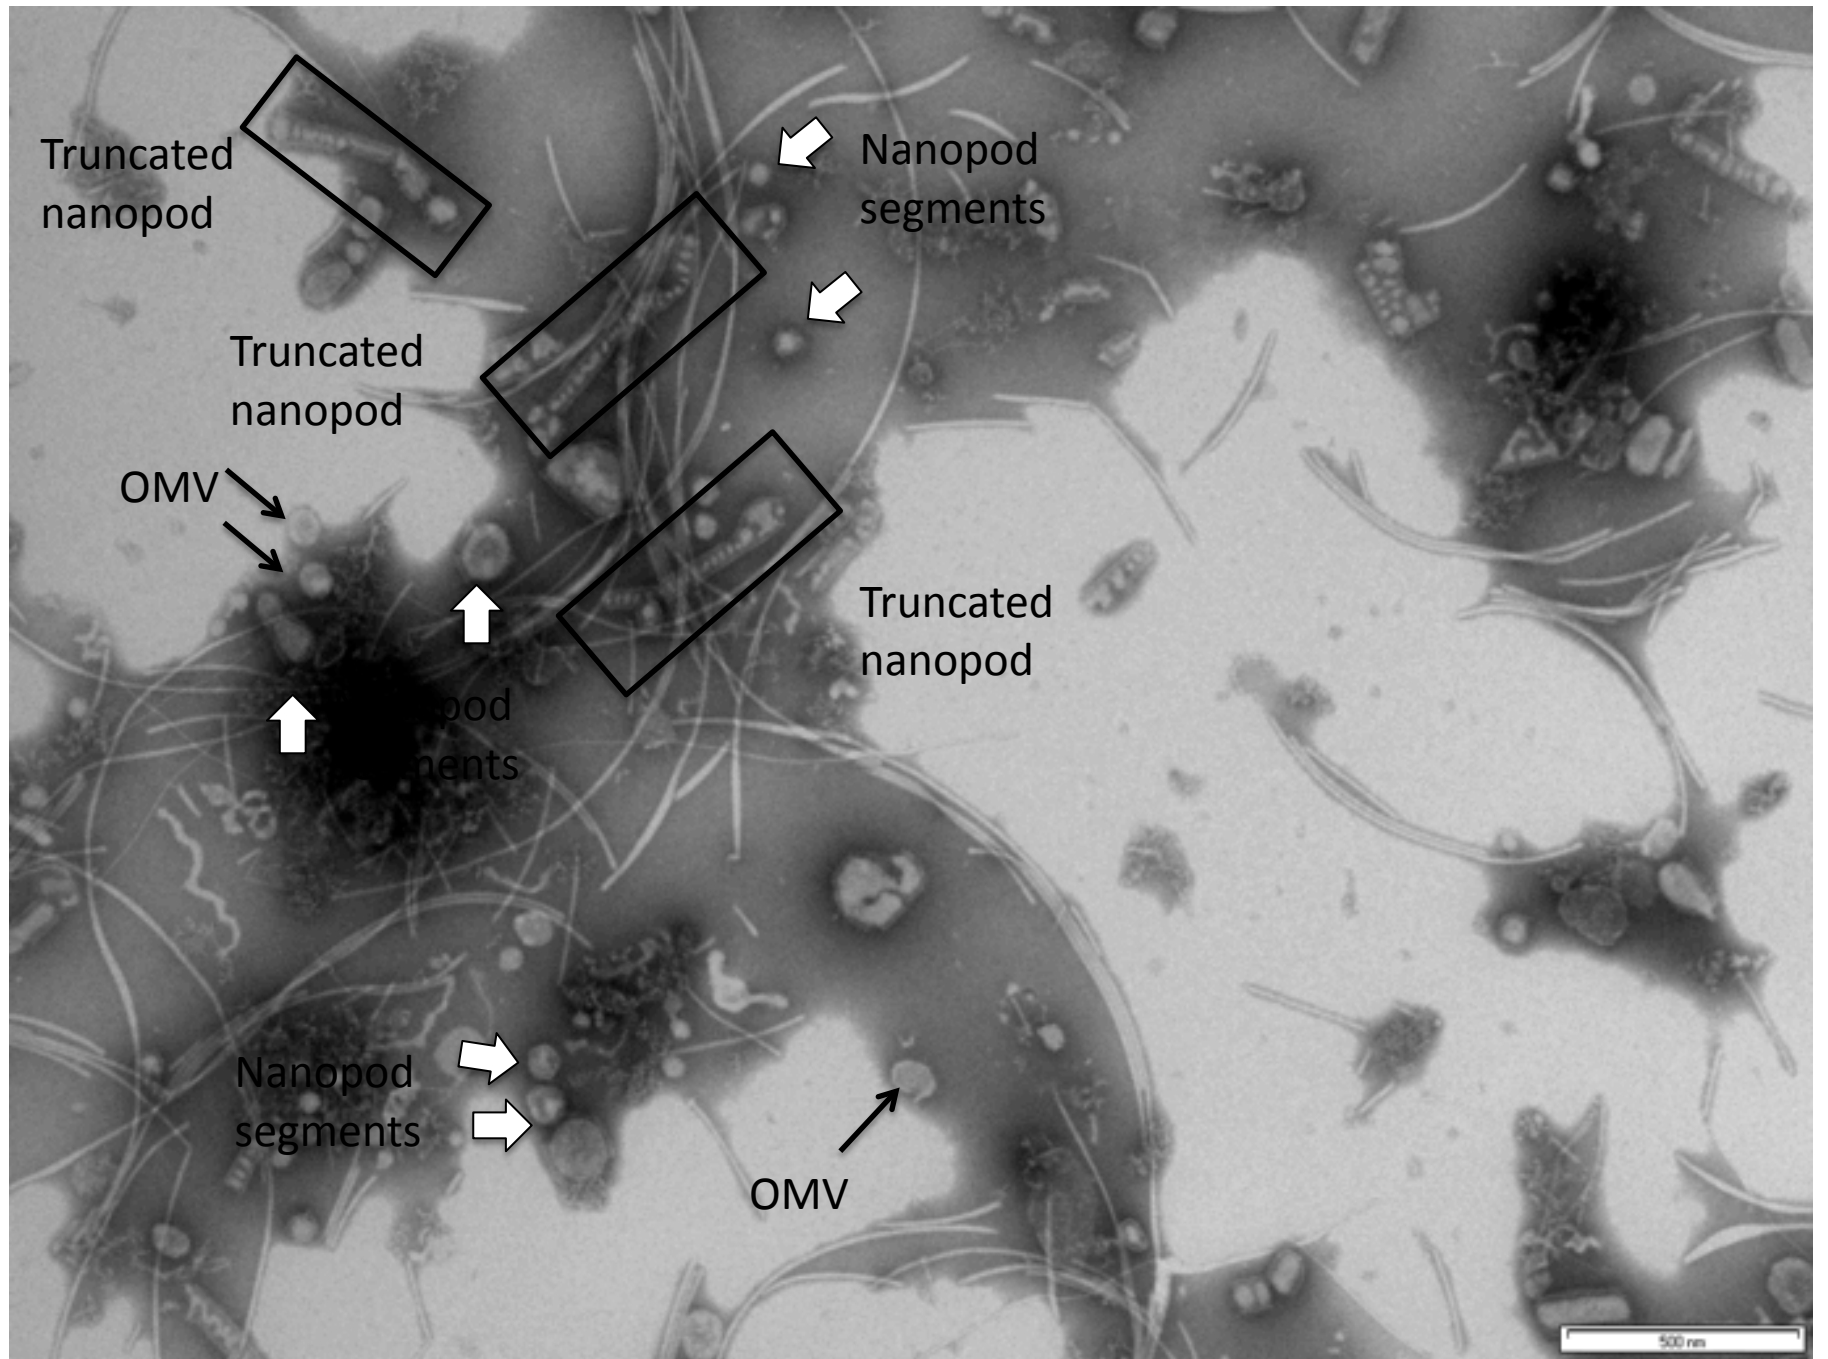

Figure S1\_G

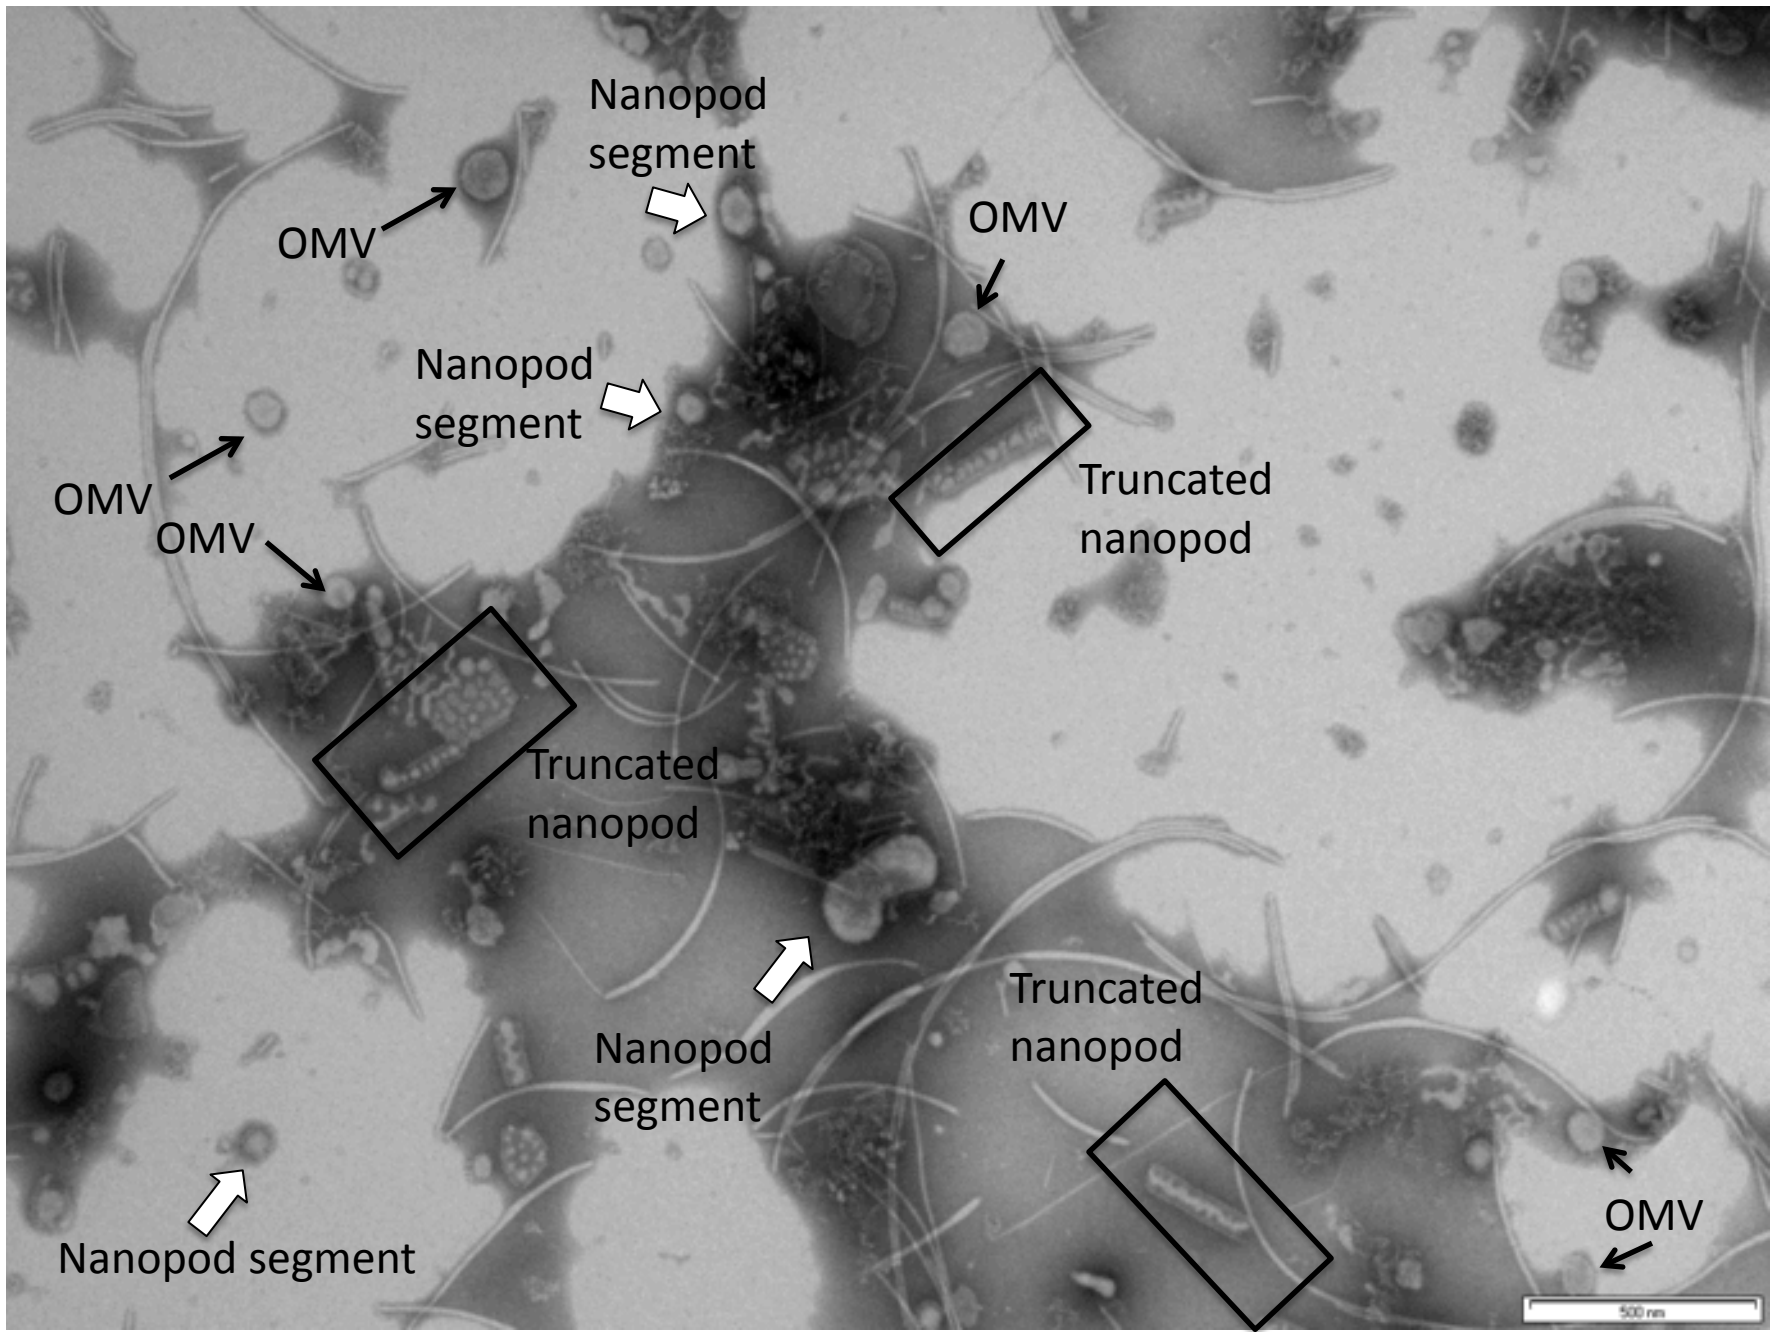

Figure S1\_H



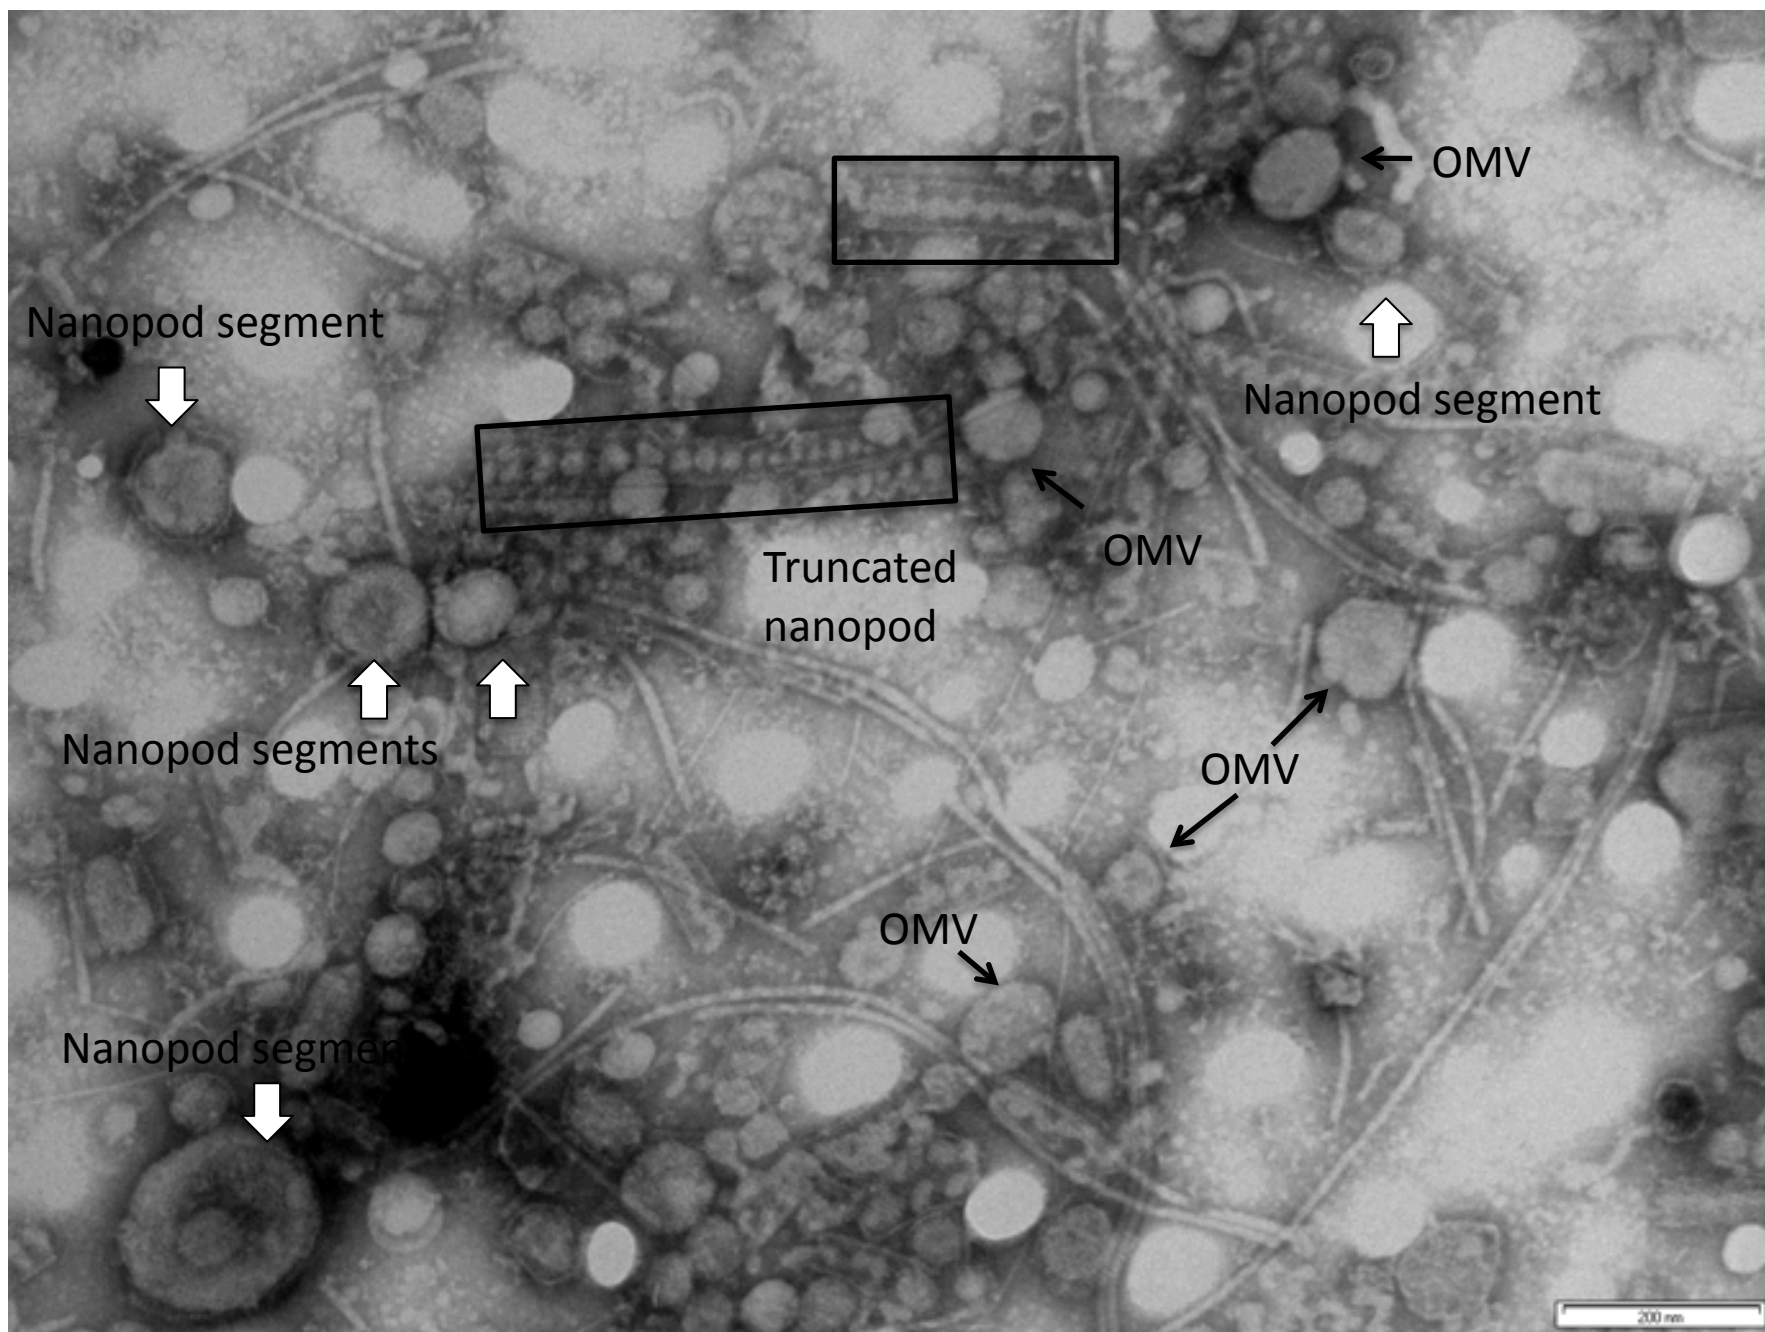

Figure S1\_I
